# Supplementary material
Source: Research Square preprint supplement (doi:10.21203/rs.3.rs-8912605/v1)
Supplement: Supplementary file 1 [file ce8ef40fd183c09c4722e618.xlsx]

## Sheet: Index
Sheet Index
No.	Sheet Name
1	Overview of datasets
2	AD_Amplicon_genus
3	ASD_Amplicon_genus
4	ASD_Metagenomics_genus
5	ASD_Metagenomics_species
6	AS_Metagenomics_genus
7	AS_Metagenomics_species
8	Adenoma_Metagenomics_genus
9	Adenoma_Metagenomics_species
10	CDI_Amplicon_genus
11	CD_Amplicon_genus
12	CD_Metagenomics_genus
13	CD_Metagenomics_species
14	CFS_Amplicon_genus
15	CRC_Amplicon_genus
16	CRC_Metagenomics_genus
17	CRC_Metagenomics_species
18	IBD_Metagenomics_genus
19	IBD_Metagenomics_species
20	IBS_Amplicon_genus
21	JA_Amplicon_genus
22	MCI_Amplicon_genus
23	MS_Amplicon_genus
24	NAFLD_Amplicon_genus
25	Obesity_Metagenomics_genus
26	Obesity_Metagenomics_species
27	Overweight_Metagenomics_genus
28	Overweight_Metagenomics_species
29	PD_Amplicon_genus
30	PD_Metagenomics_genus
31	PD_Metagenomics_species
32	RA_Amplicon_genus
33	RA_Metagenomics_genus
34	RA_Metagenomics_species
35	T2D_Amplicon_genus
36	T2D_Metagenomics_genus
37	T2D_Metagenomics_species
38	UC_Amplicon_genus
39	UC_Metagenomics_genus
40	UC_Metagenomics_species
41	Interpretability_Top50

## Sheet: Overview of datasets
Overview of datasets
Disease type	Disease	Disease abbreviation	Project id	Data type
Mental Disorder	Alzheimer's Disease	AD	PRJNA633959	16S
			PRJNA496408
			PRJNA489760
			PRJNA554111
	Mild Cognitive Impairment	MCI	PRJNA489760	16S
			PRJNA496408
	Parkinson's Disease	PD	PRJNA433459	mNGS
			PRJEB17784
	Parkinson's Disease	PD	PRJDB8639	16S
			PRJNA601994
			PRJEB27564
			PRJEB30615
			PRJNA381395
			PRJEB4927
	Autism Spectrum Disorder	ASD	PRJEB23052	mNGS
			PRJNA516054
			PRJNA451479
			PRJNA686821
	Autism Spectrum Disorder	ASD	PRJNA578223	16S
			PRJNA687773
			PRJNA453621
			PRJNA589343
			PRJNA624252
			PRJEB27306
	Chronic Fatigue Syndrome	CFS	PRJEB13092	16S
			PRJNA702086
intestinal diseases	Colorectal Cancer	CRC	PRJEB10878	mNGS
			PRJEB27928
			PRJEB7774
			PRJEB12449
			PRJDB4176
			PRJEB6070
			PRJNA447983
	Colorectal Cancer	CRC	PRJNA453829	16S
			PRJNA445640
	Clostridium infection	CDI	PRJNA353587	16S
			PRJNA379979
	Adenoma	Adenoma	PRJEB7774	mNGS
			PRJEB6070
			PRJNA447983
	Crohn Disease	CD	PRJNA389280	mNGS
			SRP057027
			PRJEB15371
			PRJNA400072
			PRJNA487636
	Crohn Disease	CD	PRJNA232056	16S
			PRJNA450340
			PRJNA324147
	Inflammatory Bowel Diseases	IBD	PRJEB7949	mNGS
			PRJNA385949
	Irritable Bowel Syndrome	IBS	PRJNA373876	16S
			PRJNA268708
			PRJNA46339
	Ulcerative Colitis	UC	PRJNA400072	mNGS
			PRJNA389280
			PRJNA487636
	Ulcerative Colitis	UC	PRJNA450340	16S
			PRJNA368966
			PRJNA388210
Metabolic diseases	Type 2 Diabetes Mellitus	T2D	PRJNA422434	mNGS
			PRJEB1786
	Type 2 Diabetes Mellitus	T2D	PRJNA448494	16S
			PRJNA588353
			PRJDB9608
			PRJNA505546
	Obesity	Obesity	PRJEB4336	mNGS
			PRJEB12123
	Overweight	Overweight	PRJEB6997	mNGS
			PRJEB4336
Liver disease	Non-alcoholic Fatty Liver Disease	NAFLD	PRJNA540738	16S
			PRJNA246121
			PRJNA382861
Autoimmune diseases	Multiple Sclerosis	MS	PRJNA450340	16S
			PRJNA321051
	Rheumatoid Arthritis	RA	PRJEB6997	mNGS
			PRJNA356102
			PRJNA487636
	Rheumatoid Arthritis	RA	PRJNA450340	16S
			PRJNA574565
	Ankylosing Spondylitis	AS	PRJNA375935	mNGS
			PRJEB28545
	Juvenile Arthritis	JA	PRJNA282362	16S
			PRJNA379123
Project id is linked with NCBI official accession number.

## Sheet: AD_Amplicon_genus
Transformation: RA
ElasticNet						RandomForest						TabPFN						MGM
Project	PRJNA633959	PRJNA496408	PRJNA489760	PRJNA554111		Project	PRJNA633959	PRJNA496408	PRJNA489760	PRJNA554111		Project	PRJNA633959	PRJNA496408	PRJNA489760	PRJNA554111		Project	PRJNA633959	PRJNA496408	PRJNA489760	PRJNA554111
PRJNA633959	0.758381	0.528139	0.364444	0.548405		PRJNA633959	0.830476	0.39881	0.5	0.515955		PRJNA633959	0.836714	0.337662	0.644444	0.468361		PRJNA633959	0.78014	0.5341	0.7144	0.4427
PRJNA496408	0.626761	0.683492	0.124444	0.52569		PRJNA496408	0.485775	0.56	0.567778	0.567604		PRJNA496408	0.497324	0.483492	0.64	0.48675		PRJNA496408	0.5276	0.6476	0.6036	0.5691
PRJNA489760	0.483521	0.504329	0.994444	0.559762		PRJNA489760	0.555493	0.530303	0.977778	0.612493		PRJNA489760	0.542958	0.534632	0.972222	0.577069		PRJNA489760	0.5513	0.5265	0.91112	0.52
PRJNA554111	0.474507	0.495671	0.868889	0.618519		PRJNA554111	0.440141	0.535714	0.708333	0.565432		PRJNA554111	0.488592	0.583333	0.438889	0.575926		PRJNA554111	0.3748	0.5847	0.5267	0.49288
LOSO	0.630141	0.474026	0.468889	0.445646		LOSO	0.533099	0.411797	0.592222	0.55165		LOSO	0.584789	0.420996	0.666667	0.445105		LOSO	0.5552	0.5839	0.4961	0.4863
DebiasM	0.661408	0.514069	0.632222	0.482423		DebiasM	0.528732	0.52381	0.447778	0.387236		DebiasM	0.592958	0.502165	0.441111	0.477555
ComBat	0.647465	0.515152	0.632222	0.55868		ComBat	0.605775	0.550325	0.677222	0.643321		ComBat	0.569014	0.467532	0.693333	0.50622
MMUPHin	0.638592	0.457792	0.725556	0.538129		MMUPHin	0.515845	0.436147	0.75	0.574365		MMUPHin	0.612113	0.462121	0.75	0.524608
Transformation: binary
ElasticNet						RandomForest						TabPFN
Project	PRJNA633959	PRJNA496408	PRJNA489760	PRJNA554111		Project	PRJNA633959	PRJNA496408	PRJNA489760	PRJNA554111		Project	PRJNA633959	PRJNA496408	PRJNA489760	PRJNA554111
PRJNA633959	0.81419	0.512987	0.71	0.440779		PRJNA633959	0.829	0.490801	0.818889	0.432937		PRJNA633959	0.830667	0.384199	0.696667	0.40887
PRJNA496408	0.536549	0.531667	0.782222	0.53272		PRJNA496408	0.536479	0.540476	0.704444	0.574365		PRJNA496408	0.582817	0.60619	0.871111	0.479719
PRJNA489760	0.599577	0.538961	0.955556	0.511087		PRJNA489760	0.628028	0.515693	0.969444	0.527582		PRJNA489760	0.619014	0.467532	0.95	0.505138
PRJNA554111	0.441901	0.579545	0.497778	0.523148		PRJNA554111	0.396056	0.585498	0.526111	0.609259		PRJNA554111	0.420282	0.569264	0.437778	0.564506
LOSO	0.476479	0.560065	0.694444	0.427258		LOSO	0.477183	0.569264	0.651111	0.46782		LOSO	0.593944	0.427489	0.737778	0.364521
Transformation: log_std
ElasticNet						RandomForest						TabPFN
Project	PRJNA633959	PRJNA496408	PRJNA489760	PRJNA554111		Project	PRJNA633959	PRJNA496408	PRJNA489760	PRJNA554111		Project	PRJNA633959	PRJNA496408	PRJNA489760	PRJNA554111
PRJNA633959	0.810952	0.538961	0.754444	0.444024		PRJNA633959	0.834643	0.416126	0.687222	0.494592		PRJNA633959	0.837143	0.431818	0.762222	0.432666
PRJNA496408	0.5	0.53619	0.5	0.5		PRJNA496408	0.416338	0.572222	0.503889	0.575717		PRJNA496408	0.529859	0.577937	0.87	0.51271
PRJNA489760	0.629155	0.493506	0.972222	0.548405		PRJNA489760	0.582606	0.479437	0.977778	0.559762		PRJNA489760	0.607746	0.488095	0.966667	0.524067
PRJNA554111	0.458028	0.585498	0.427778	0.624691		PRJNA554111	0.493239	0.614177	0.649444	0.536574		PRJNA554111	0.492394	0.640693	0.513333	0.555556
LOSO	0.494225	0.522727	0.668889	0.385614		LOSO	0.530282	0.449134	0.656111	0.504056		LOSO	0.625352	0.528139	0.658889	0.411574
DebiasM	0.549155	0.442641	0.694444	0.426717		DebiasM	0.556338	0.541126	0.526667	0.5192		DebiasM	0.577183	0.54329	0.714444	0.362358
ComBat	0.495352	0.512987	0.654444	0.405084		ComBat	0.535493	0.555195	0.649444	0.489183		ComBat	0.619437	0.532468	0.687778	0.420768
Transformation: ALR
ElasticNet						RandomForest						TabPFN
Project	PRJNA633959	PRJNA496408	PRJNA489760	PRJNA554111		Project	PRJNA633959	PRJNA496408	PRJNA489760	PRJNA554111		Project	PRJNA633959	PRJNA496408	PRJNA489760	PRJNA554111
PRJNA633959	0.814048	0.492424	0.784444	0.46782		PRJNA633959	0.827976	0.391775	0.596667	0.497566		PRJNA633959	0.84219	0.348485	0.757778	0.447269
PRJNA496408	0.5	0.447143	0.5	0.5		PRJNA496408	0.41	0.550159	0.495556	0.490535		PRJNA496408	0.512254	0.556984	0.865556	0.515414
PRJNA489760	0.615352	0.524892	0.972222	0.539751		PRJNA489760	0.539789	0.556818	0.980556	0.555976		PRJNA489760	0.548028	0.454545	0.966667	0.530016
PRJNA554111	0.417887	0.568182	0.512222	0.547531		PRJNA554111	0.485	0.473485	0.566111	0.553086		PRJNA554111	0.452817	0.612554	0.488889	0.517593
LOSO	0.563803	0.551948	0.76	0.431044		LOSO	0.557183	0.439394	0.621111	0.535425		LOSO	0.582535	0.455628	0.746667	0.43483
DebiasM	0.63338	0.527056	0.738889	0.432666		DebiasM	0.599577	0.458874	0.711111	0.518659		DebiasM	0.537887	0.475108	0.85	0.46079
ComBat	0.562535	0.531385	0.74	0.425095		ComBat	0.559155	0.493506	0.715556	0.553002		ComBat	0.626901	0.492424	0.67	0.433748
Transformation: CLR
ElasticNet						RandomForest						TabPFN
Project	PRJNA633959	PRJNA496408	PRJNA489760	PRJNA554111		Project	PRJNA633959	PRJNA496408	PRJNA489760	PRJNA554111		Project	PRJNA633959	PRJNA496408	PRJNA489760	PRJNA554111
PRJNA633959	0.795619	0.516234	0.777778	0.445646		PRJNA633959	0.801714	0.352814	0.727222	0.526501		PRJNA633959	0.846952	0.395022	0.793333	0.416441
PRJNA496408	0.5	0.469206	0.5	0.5		PRJNA496408	0.514648	0.592857	0.553333	0.478367		PRJNA496408	0.503099	0.566349	0.775556	0.483505
PRJNA489760	0.616761	0.546537	0.972222	0.526771		PRJNA489760	0.580563	0.473485	0.972222	0.484857		PRJNA489760	0.509859	0.541126	0.966667	0.51974
PRJNA554111	0.389014	0.599567	0.513333	0.539506		PRJNA554111	0.481338	0.376082	0.425556	0.547685		PRJNA554111	0.527746	0.443723	0.532222	0.506173
LOSO	0.565775	0.582251	0.755556	0.429421		LOSO	0.549577	0.437229	0.655556	0.540292		LOSO	0.571831	0.47619	0.766667	0.445646
DebiasM	0.668732	0.527056	0.812222	0.462953		DebiasM	0.56838	0.424242	0.718889	0.545971		DebiasM	0.625211	0.484848	0.831111	0.438075
ComBat	0.564225	0.542208	0.737778	0.388859		ComBat	0.61831	0.487013	0.638889	0.526771		ComBat	0.605634	0.480519	0.718889	0.437534
Transformation: gptemb
ElasticNet						RandomForest						TabPFN
Project	PRJNA633959	PRJNA496408	PRJNA489760	PRJNA554111		Project	PRJNA633959	PRJNA496408	PRJNA489760	PRJNA554111		Project	PRJNA633959	PRJNA496408	PRJNA489760	PRJNA554111
PRJNA633959	0.777714	0.424242	0.562222	0.492699		PRJNA633959	0.748405	0.589286	0.264444	0.504327		PRJNA633959	0.764095	0.548701	0.35	0.414819
PRJNA496408	0.576338	0.679524	0.254444	0.497566		PRJNA496408	0.549718	0.573016	0.212778	0.56463		PRJNA496408	0.557324	0.605397	0.19	0.550027
PRJNA489760	0.46493	0.488095	0.983333	0.56517		PRJNA489760	0.460915	0.491342	0.977778	0.55192		PRJNA489760	0.412535	0.508658	1	0.618172
PRJNA554111	0.483944	0.502165	0.802222	0.704012		PRJNA554111	0.398099	0.453463	0.765	0.68642		PRJNA554111	0.433803	0.521645	0.752222	0.683951
LOSO	0.633662	0.49026	0.288889	0.485127		LOSO	0.527746	0.541667	0.36	0.548945		LOSO	0.653944	0.485931	0.332222	0.469443

## Sheet: ASD_Amplicon_genus
Transformation: RA
ElasticNet								RandomForest								TabPFN								MGM
Project	PRJNA578223	PRJNA687773	PRJNA453621	PRJNA589343	PRJNA624252	PRJEB27306		Project	PRJNA578223	PRJNA687773	PRJNA453621	PRJNA589343	PRJNA624252	PRJEB27306		Project	PRJNA578223	PRJNA687773	PRJNA453621	PRJNA589343	PRJNA624252	PRJEB27306		Project	PRJNA578223	PRJNA687773	PRJNA453621	PRJNA589343	PRJNA624252	PRJEB27306
PRJNA578223	0.860222	0.298368	0.381535	0.394805	0.636207	0.464755		PRJNA578223	0.955333	0.365967	0.360849	0.446753	0.558621	0.58184		PRJNA578223	0.947111	0.340909	0.354785	0.356883	0.52931	0.567503		PRJNA578223	0.88844	0.3922	0.5054	0.6938	0.5397	0.5206
PRJNA687773	0.166667	0.675893	0.589124	0.635584	0.543103	0.500597		PRJNA687773	0.330512	0.675496	0.521297	0.767532	0.575862	0.4092		PRJNA687773	0.303385	0.638591	0.493129	0.72026	0.558621	0.458781		PRJNA687773	0.3019	0.5363	0.5539	0.5582	0.519	0.4701
PRJNA453621	0.204427	0.651515	0.673543	0.582338	0.368966	0.448029		PRJNA453621	0.349175	0.433858	0.889035	0.493506	0.569828	0.573477		PRJNA453621	0.415799	0.47669	0.932529	0.374026	0.574138	0.639188		PRJNA453621	0.6085	0.5061	0.80204	0.6847	0.4638	0.483
PRJNA589343	0.37934	0.647436	0.51983	0.762083	0.522414	0.480287		PRJNA589343	0.514757	0.458625	0.545821	0.885292	0.513793	0.487455		PRJNA589343	0.362413	0.656177	0.644384	0.903	0.415517	0.416965		PRJNA589343	0.5105	0.54	0.5858	0.8176	0.4125	0.3769
PRJNA624252	0.61849	0.428904	0.375666	0.44	0.671667	0.473118		PRJNA624252	0.401259	0.582168	0.427918	0.462468	0.575833	0.398447		PRJNA624252	0.702691	0.47669	0.350531	0.415325	0.575	0.401434		PRJNA624252	0.6402	0.4725	0.5515	0.6864	0.4321	0.4686
PRJEB27306	0.447049	0.40035	0.426622	0.487273	0.505172	0.50127		PRJEB27306	0.615234	0.472902	0.625654	0.424545	0.337931	0.58119		PRJEB27306	0.480035	0.452797	0.505991	0.471429	0.32069	0.527937		PRJEB27306	0.646	0.4541	0.555	0.6758	0.4272	0.4684
LOSO	0.290365	0.321096	0.552839	0.584416	0.710345	0.487455		LOSO	0.432292	0.416084	0.609614	0.492987	0.548276	0.5227		LOSO	0.514323	0.452797	0.608832	0.577662	0.562069	0.507766		LOSO	0.5156	0.4334	0.5821	0.7282	0.5388	0.448
DebiasM	0.259115	0.410839	0.436207	0.535844	0.648276	0.475508		DebiasM	0.400608	0.402098	0.467896	0.552987	0.712069	0.402628		DebiasM	0.353299	0.468531	0.523546	0.397662	0.732759	0.577061
ComBat	0.335069	0.349068	0.5	0.596883	0.743103	0.448029		ComBat	0.392795	0.428613	0.566067	0.491948	0.57069	0.508363		ComBat	0.455729	0.495338	0.502567	0.624156	0.612069	0.492234
MMUPHin	0.263455	0.416667	0.530539	0.516364	0.536207	0.46595		MMUPHin	0.454427	0.450758	0.616167	0.649091	0.55	0.403823		MMUPHin	0.522569	0.515152	0.487799	0.536104	0.608621	0.437276
Transformation: binary
ElasticNet								RandomForest								TabPFN
Project	PRJNA578223	PRJNA687773	PRJNA453621	PRJNA589343	PRJNA624252	PRJEB27306		Project	PRJNA578223	PRJNA687773	PRJNA453621	PRJNA589343	PRJNA624252	PRJEB27306		Project	PRJNA578223	PRJNA687773	PRJNA453621	PRJNA589343	PRJNA624252	PRJEB27306
PRJNA578223	0.879111	0.388695	0.44254	0.425325	0.577586	0.473716		PRJNA578223	0.899889	0.410839	0.475353	0.544935	0.558621	0.467145		PRJNA578223	0.898222	0.412005	0.522739	0.506753	0.548276	0.479092
PRJNA687773	0.273872	0.569841	0.588097	0.592987	0.594828	0.415173		PRJNA687773	0.413628	0.635417	0.564037	0.638571	0.555172	0.532855		PRJNA687773	0.37283	0.589534	0.564502	0.601558	0.543103	0.46595
PRJNA453621	0.786458	0.486597	0.751299	0.367013	0.572414	0.550777		PRJNA453621	0.657335	0.494464	0.789821	0.453377	0.680172	0.5227		PRJNA453621	0.657118	0.564685	0.808519	0.515325	0.627586	0.646356
PRJNA589343	0.643229	0.530012	0.568072	0.761583	0.443966	0.557348		PRJNA589343	0.578125	0.541667	0.575603	0.757333	0.458621	0.4773		PRJNA589343	0.447917	0.642191	0.588195	0.7825	0.448276	0.495818
PRJNA624252	0.514323	0.472028	0.409458	0.447013	0.433333	0.446237		PRJNA624252	0.577691	0.535548	0.402073	0.36974	0.496667	0.321983		PRJNA624252	0.555122	0.503497	0.457749	0.391429	0.545	0.366786
PRJEB27306	0.405816	0.553613	0.534574	0.533766	0.410345	0.55381		PRJEB27306	0.500217	0.540793	0.542961	0.464416	0.423276	0.579683		PRJEB27306	0.541233	0.521562	0.500171	0.452468	0.367241	0.540476
LOSO	0.595269	0.490676	0.607878	0.601299	0.596552	0.605735		LOSO	0.606554	0.465035	0.557582	0.587792	0.536207	0.57945		LOSO	0.562066	0.484848	0.601056	0.626234	0.458621	0.598566
Transformation: log_std
ElasticNet								RandomForest								TabPFN
Project	PRJNA578223	PRJNA687773	PRJNA453621	PRJNA589343	PRJNA624252	PRJEB27306		Project	PRJNA578223	PRJNA687773	PRJNA453621	PRJNA589343	PRJNA624252	PRJEB27306		Project	PRJNA578223	PRJNA687773	PRJNA453621	PRJNA589343	PRJNA624252	PRJEB27306
PRJNA578223	0.944	0.328671	0.358942	0.414805	0.5	0.538829		PRJNA578223	0.940222	0.372086	0.474546	0.508961	0.584483	0.599761		PRJNA578223	0.907778	0.315268	0.370532	0.418442	0.503448	0.578256
PRJNA687773	0.335503	0.606349	0.645997	0.694286	0.546552	0.523297		PRJNA687773	0.363715	0.70501	0.533571	0.59	0.54569	0.449223		PRJNA687773	0.243924	0.648512	0.540271	0.712727	0.601724	0.475508
PRJNA453621	0.434896	0.550117	0.829183	0.506494	0.57069	0.626045		PRJNA453621	0.358073	0.472028	0.888504	0.525844	0.463793	0.501792		PRJNA453621	0.563802	0.47669	0.922244	0.513766	0.52931	0.519713
PRJNA589343	0.528646	0.527389	0.556604	0.901083	0.565517	0.46356		PRJNA589343	0.529514	0.51486	0.539611	0.901333	0.467241	0.483871		PRJNA589343	0.398438	0.58042	0.564967	0.89875	0.6	0.419355
PRJNA624252	0.441406	0.50641	0.50868	0.501039	0.531667	0.450418		PRJNA624252	0.473741	0.552448	0.499487	0.471039	0.53	0.415173		PRJNA624252	0.550781	0.509324	0.429361	0.437922	0.618333	0.348865
PRJEB27306	0.453993	0.527972	0.501785	0.391429	0.377586	0.57746		PRJEB27306	0.686849	0.422786	0.464521	0.524286	0.415517	0.43754		PRJEB27306	0.532118	0.505828	0.41337	0.577143	0.367241	0.490794
LOSO	0.387153	0.478438	0.565064	0.646753	0.537931	0.571087		LOSO	0.47678	0.428904	0.53362	0.5	0.515517	0.593787		LOSO	0.34809	0.389277	0.497139	0.551429	0.594828	0.609319
DebiasM	0.278646	0.682401	0.522666	0.636104	0.522414	0.60693		DebiasM	0.341146	0.485723	0.408357	0.518182	0.284483	0.60454		DebiasM	0.303819	0.505828	0.533009	0.642078	0.605172	0.48626
ComBat	0.453125	0.514569	0.567118	0.598442	0.584483	0.535245		ComBat	0.480035	0.429487	0.45726	0.486234	0.541379	0.512545		ComBat	0.472222	0.456876	0.441929	0.434545	0.567241	0.566308
Transformation: ALR
ElasticNet								RandomForest								TabPFN
Project	PRJNA578223	PRJNA687773	PRJNA453621	PRJNA589343	PRJNA624252	PRJEB27306		Project	PRJNA578223	PRJNA687773	PRJNA453621	PRJNA589343	PRJNA624252	PRJEB27306		Project	PRJNA578223	PRJNA687773	PRJNA453621	PRJNA589343	PRJNA624252	PRJEB27306
PRJNA578223	0.883778	0.368881	0.361631	0.347013	0.593103	0.428913		PRJNA578223	0.954889	0.42366	0.439361	0.543247	0.5	0.471924		PRJNA578223	0.929556	0.347902	0.371314	0.487792	0.463793	0.518519
PRJNA687773	0.296875	0.598859	0.650496	0.771429	0.489655	0.505376		PRJNA687773	0.25	0.672272	0.52296	0.596364	0.632759	0.448626		PRJNA687773	0.239583	0.641071	0.557191	0.745195	0.505172	0.410992
PRJNA453621	0.528212	0.505828	0.823424	0.522338	0.65	0.53644		PRJNA453621	0.427083	0.699009	0.885073	0.456753	0.47069	0.528076		PRJNA453621	0.509983	0.493007	0.935434	0.514545	0.653448	0.618877
PRJNA589343	0.571615	0.513403	0.551861	0.904083	0.653448	0.454002		PRJNA589343	0.366536	0.675991	0.614602	0.9	0.457759	0.475508		PRJNA589343	0.380642	0.631702	0.638809	0.897667	0.560345	0.403823
PRJNA624252	0.53559	0.477855	0.509414	0.497922	0.411667	0.48865		PRJNA624252	0.511719	0.512821	0.519072	0.59974	0.586667	0.423536		PRJNA624252	0.543403	0.533217	0.392684	0.424675	0.573333	0.340502
PRJEB27306	0.469618	0.502331	0.543498	0.465974	0.510345	0.593968		PRJEB27306	0.50803	0.355186	0.567607	0.301948	0.371552	0.527143		PRJEB27306	0.491319	0.4831	0.538804	0.529091	0.393103	0.550635
LOSO	0.408854	0.5	0.471319	0.586494	0.705172	0.493429		LOSO	0.436632	0.415501	0.434667	0.438182	0.52069	0.509558		LOSO	0.401042	0.409674	0.526432	0.585714	0.55	0.444444
DebiasM	0.422309	0.514569	0.34256	0.352987	0.482759	0.563919		DebiasM	0.349175	0.417832	0.425302	0.53039	0.553448	0.379928		DebiasM	0.361545	0.452214	0.574454	0.559221	0.631034	0.520908
ComBat	0.556858	0.526807	0.513717	0.591688	0.624138	0.44325		ComBat	0.418837	0.427739	0.481393	0.431429	0.543103	0.456989		ComBat	0.467448	0.438228	0.53851	0.468052	0.658621	0.449223
Transformation: CLR
ElasticNet								RandomForest								TabPFN
Project	PRJNA578223	PRJNA687773	PRJNA453621	PRJNA589343	PRJNA624252	PRJEB27306		Project	PRJNA578223	PRJNA687773	PRJNA453621	PRJNA589343	PRJNA624252	PRJEB27306		Project	PRJNA578223	PRJNA687773	PRJNA453621	PRJNA589343	PRJNA624252	PRJEB27306
PRJNA578223	0.881556	0.38345	0.366668	0.357922	0.603448	0.431302		PRJNA578223	0.922667	0.369464	0.382904	0.334416	0.562069	0.529869		PRJNA578223	0.926889	0.357809	0.372292	0.427532	0.487931	0.525687
PRJNA687773	0.271267	0.613046	0.647464	0.756104	0.536207	0.51135		PRJNA687773	0.215278	0.620089	0.602426	0.561169	0.6	0.433692		PRJNA687773	0.222656	0.629117	0.549954	0.698442	0.525862	0.44086
PRJNA453621	0.521701	0.505828	0.821463	0.518182	0.644828	0.549582		PRJNA453621	0.486979	0.512529	0.879136	0.581948	0.662931	0.506571		PRJNA453621	0.392361	0.424825	0.932945	0.518442	0.57931	0.630824
PRJNA589343	0.572483	0.516317	0.565651	0.906667	0.655172	0.439665		PRJNA589343	0.520833	0.571387	0.519194	0.8665	0.462069	0.507766		PRJNA589343	0.431424	0.65035	0.64409	0.902667	0.608621	0.39546
PRJNA624252	0.53559	0.47669	0.508582	0.495844	0.436667	0.495818		PRJNA624252	0.482205	0.564977	0.480879	0.515455	0.501667	0.302867		PRJNA624252	0.536458	0.491259	0.435523	0.416623	0.555	0.439665
PRJEB27306	0.504774	0.508159	0.5568	0.466234	0.537931	0.59619		PRJEB27306	0.573134	0.438811	0.476698	0.328831	0.461207	0.485079		PRJEB27306	0.542101	0.526807	0.459338	0.454286	0.417241	0.556667
LOSO	0.380208	0.4662	0.525307	0.589091	0.693103	0.481481		LOSO	0.384983	0.506993	0.66101	0.514805	0.598276	0.342891		LOSO	0.447049	0.4662	0.610103	0.602597	0.594828	0.461171
DebiasM	0.246094	0.428322	0.336398	0.549091	0.548276	0.442055		DebiasM	0.686632	0.475233	0.613331	0.472727	0.437931	0.510155		DebiasM	0.382812	0.458042	0.5234	0.501558	0.47069	0.482676
ComBat	0.359809	0.505245	0.57641	0.436364	0.612069	0.523297		ComBat	0.383247	0.50641	0.566874	0.565065	0.517241	0.647551		ComBat	0.295139	0.455711	0.588146	0.486234	0.482759	0.53644
Transformation: gptemb
ElasticNet								RandomForest								TabPFN
Project	PRJNA578223	PRJNA687773	PRJNA453621	PRJNA589343	PRJNA624252	PRJEB27306		Project	PRJNA578223	PRJNA687773	PRJNA453621	PRJNA589343	PRJNA624252	PRJEB27306		Project	PRJNA578223	PRJNA687773	PRJNA453621	PRJNA589343	PRJNA624252	PRJEB27306
PRJNA578223	0.840889	0.31352	0.400411	0.423636	0.605172	0.450418		PRJNA578223	0.88	0.302156	0.36393	0.467532	0.65	0.442055		PRJNA578223	0.892889	0.281469	0.397379	0.475065	0.665517	0.442055
PRJNA687773	0.177083	0.611706	0.54076	0.682078	0.465517	0.501792		PRJNA687773	0.261936	0.683284	0.593183	0.618442	0.377586	0.456989		PRJNA687773	0.225694	0.688542	0.587461	0.677143	0.365517	0.477897
PRJNA453621	0.547309	0.406177	0.675684	0.533506	0.481034	0.422939		PRJNA453621	0.442708	0.60373	0.746327	0.527273	0.365517	0.482676		PRJNA453621	0.353299	0.584499	0.762409	0.58961	0.42069	0.444444
PRJNA589343	0.380208	0.661422	0.54164	0.75025	0.505172	0.493429		PRJNA589343	0.404297	0.660256	0.511468	0.738542	0.452586	0.500597		PRJNA589343	0.480903	0.605478	0.595188	0.736083	0.565517	0.46356
PRJNA624252	0.580295	0.568765	0.534696	0.456364	0.675	0.44325		PRJNA624252	0.615017	0.372378	0.364566	0.529091	0.6025	0.498208		PRJNA624252	0.612413	0.527389	0.536016	0.608052	0.678333	0.430108
PRJEB27306	0.5	0.5	0.5	0.5	0.5	0.492222		PRJEB27306	0.544705	0.290793	0.412001	0.434935	0.548276	0.440794		PRJEB27306	0.557292	0.367133	0.414886	0.442338	0.475862	0.448889
LOSO	0.436198	0.370629	0.573769	0.586753	0.567241	0.459976		LOSO	0.348958	0.47669	0.457137	0.426753	0.253448	0.459976		LOSO	0.217014	0.402098	0.6058	0.608831	0.444828	0.376344

## Sheet: ASD_Metagenomics_genus
Transformation: RA
ElasticNet						RandomForest						TabPFN						MGM
Project	PRJEB23052	PRJNA516054	PRJNA451479	PRJNA686821		Project	PRJEB23052	PRJNA516054	PRJNA451479	PRJNA686821		Project	PRJEB23052	PRJNA516054	PRJNA451479	PRJNA686821		Project	PRJEB23052	PRJNA516054	PRJNA451479	PRJNA686821
PRJEB23052	0.488889	0.5	0.5	0.5		PRJEB23052	0.956019	0.386561	0.830556	0.462649		PRJEB23052	0.958995	0.471937	0.836667	0.419355		PRJEB23052	0.39942	0.5178	0.8522	0.473
PRJNA516054	0.554389	0.597273	0.535556	0.483022		PRJNA516054	0.440735	0.629091	0.452222	0.487408		PRJNA516054	0.430608	0.632727	0.548889	0.475665		PRJNA516054	0.2886	0.72634	0.46	0.571
PRJNA451479	0.55964	0.482213	0.461111	0.442841		PRJNA451479	0.875469	0.526482	0.691667	0.474958		PRJNA451479	0.753188	0.460079	0.694444	0.494624		PRJNA451479	0.6403	0.4336	0.58054	0.5378
PRJNA686821	0.5	0.5	0.5	0.460839		PRJNA686821	0.723556	0.49249	0.512778	0.640977		PRJNA686821	0.653413	0.403953	0.503333	0.663588		PRJNA686821	0.2984	0.5417	0.4797	0.58142
LOSO	0.571643	0.545455	0.472222	0.471986		LOSO	0.807952	0.460079	0.543333	0.411573		LOSO	0.703676	0.455336	0.576667	0.468591		LOSO	0.3072	0.4787	0.4666	0.4873
DebiasM	0.595649	0.605534	0.52	0.478212		DebiasM	0.758815	0.575494	0.658889	0.442699		DebiasM	0.693923	0.468775	0.614444	0.456989
ComBat	0.583646	0.554941	0.503333	0.472269		ComBat	0.609152	0.588142	0.638889	0.434069		ComBat	0.63916	0.467984	0.624444	0.519525
MMUPHin	0.597899	0.541502	0.484444	0.407753		MMUPHin	0.750563	0.530435	0.591111	0.439162		MMUPHin	0.579145	0.453755	0.643333	0.484154
Transformation: binary
ElasticNet						RandomForest						TabPFN
Project	PRJEB23052	PRJNA516054	PRJNA451479	PRJNA686821		Project	PRJEB23052	PRJNA516054	PRJNA451479	PRJNA686821		Project	PRJEB23052	PRJNA516054	PRJNA451479	PRJNA686821
PRJEB23052	0.92791	0.378656	0.807778	0.506367		PRJEB23052	0.959524	0.43004	0.803333	0.500283		PRJEB23052	0.938823	0.35415	0.825556	0.485286
PRJNA516054	0.64141	0.700909	0.397778	0.518393		PRJNA516054	0.536009	0.759545	0.319444	0.533531		PRJNA516054	0.411103	0.700909	0.291111	0.543577
PRJNA451479	0.787322	0.366798	0.688889	0.47142		PRJNA451479	0.75844	0.405534	0.744444	0.493492		PRJNA451479	0.76069	0.434783	0.727778	0.494058
PRJNA686821	0.638035	0.549012	0.395556	0.661772		PRJNA686821	0.549137	0.510672	0.468889	0.629477		PRJNA686821	0.60165	0.451383	0.468889	0.705118
LOSO	0.48012	0.377866	0.56	0.453594		LOSO	0.654914	0.392095	0.438333	0.392615		LOSO	0.603151	0.350198	0.45	0.37974
Transformation: log_std
ElasticNet						RandomForest						TabPFN
Project	PRJEB23052	PRJNA516054	PRJNA451479	PRJNA686821		Project	PRJEB23052	PRJNA516054	PRJNA451479	PRJNA686821		Project	PRJEB23052	PRJNA516054	PRJNA451479	PRJNA686821
PRJEB23052	0.83082	0.451383	0.767778	0.586022		PRJEB23052	0.91541	0.321344	0.822778	0.495756		PRJEB23052	0.918783	0.413439	0.815556	0.543011
PRJNA516054	0.459115	0.671818	0.367778	0.514431		PRJNA516054	0.542761	0.64	0.467222	0.472411		PRJNA516054	0.354089	0.644545	0.381111	0.493209
PRJNA451479	0.68042	0.4917	0.644444	0.434069		PRJNA451479	0.893473	0.54585	0.694444	0.576684		PRJNA451479	0.873968	0.394466	0.672222	0.522354
PRJNA686821	0.584396	0.555731	0.441111	0.554633		PRJNA686821	0.660915	0.57747	0.495556	0.617861		PRJNA686821	0.658665	0.55415	0.458889	0.696931
LOSO	0.564141	0.460079	0.536667	0.479344		LOSO	0.751688	0.551779	0.447778	0.388512		LOSO	0.669917	0.496443	0.628889	0.521505
DebiasM	0.551388	0.583399	0.683333	0.48953		DebiasM	0.550638	0.528458	0.676667	0.476514		DebiasM	0.483871	0.43004	0.775556	0.518959
ComBat	0.498875	0.473518	0.505556	0.450481		ComBat	0.789947	0.51502	0.588889	0.432796		ComBat	0.747187	0.421344	0.817778	0.543294
Transformation: ALR
ElasticNet						RandomForest						TabPFN
Project	PRJEB23052	PRJNA516054	PRJNA451479	PRJNA686821		Project	PRJEB23052	PRJNA516054	PRJNA451479	PRJNA686821		Project	PRJEB23052	PRJNA516054	PRJNA451479	PRJNA686821
PRJEB23052	0.790675	0.485375	0.716667	0.558574		PRJEB23052	0.959722	0.349012	0.826667	0.421053		PRJEB23052	0.957209	0.368379	0.787778	0.466327
PRJNA516054	0.433608	0.697273	0.353333	0.535654		PRJNA516054	0.405101	0.666364	0.476667	0.415535		PRJNA516054	0.385596	0.648182	0.434444	0.537068
PRJNA451479	0.607652	0.456917	0.65	0.478778		PRJNA451479	0.861215	0.467589	0.65	0.567629		PRJNA451479	0.864966	0.36996	0.694444	0.525467
PRJNA686821	0.557389	0.462451	0.407778	0.559392		PRJNA686821	0.72168	0.366798	0.658889	0.575728		PRJNA686821	0.684171	0.469565	0.481111	0.638462
LOSO	0.663166	0.418972	0.583333	0.464063		LOSO	0.684546	0.468775	0.554444	0.424448		LOSO	0.699925	0.394466	0.675556	0.418789
DebiasM	0.537884	0.451383	0.43	0.47425		DebiasM	0.528132	0.593676	0.635556	0.472977		DebiasM	0.615904	0.309881	0.627778	0.480758
ComBat	0.60165	0.429249	0.497778	0.51047		ComBat	0.744936	0.385771	0.651111	0.516978		ComBat	0.764441	0.391304	0.783333	0.505376
Transformation: CLR
ElasticNet						RandomForest						TabPFN
Project	PRJEB23052	PRJNA516054	PRJNA451479	PRJNA686821		Project	PRJEB23052	PRJNA516054	PRJNA451479	PRJNA686821		Project	PRJEB23052	PRJNA516054	PRJNA451479	PRJNA686821
PRJEB23052	0.812765	0.479842	0.712222	0.577816		PRJEB23052	0.955026	0.29249	0.785	0.539757		PRJEB23052	0.961706	0.33913	0.784444	0.443973
PRJNA516054	0.32183	0.728182	0.406667	0.519808		PRJNA516054	0.444861	0.634545	0.484444	0.590125		PRJNA516054	0.309827	0.746818	0.413333	0.515846
PRJNA451479	0.603901	0.44585	0.622222	0.440011		PRJNA451479	0.586647	0.626877	0.827778	0.544709		PRJNA451479	0.726932	0.518577	0.816667	0.458121
PRJNA686821	0.579145	0.481423	0.412222	0.547912		PRJNA686821	0.685671	0.577075	0.434444	0.697183		PRJNA686821	0.67892	0.626877	0.486667	0.7037
LOSO	0.650413	0.419763	0.592222	0.467459		LOSO	0.615154	0.530435	0.513333	0.450764		LOSO	0.677419	0.448221	0.636667	0.460668
DebiasM	0.609152	0.499605	0.43	0.462366		DebiasM	0.497374	0.376285	0.625	0.555886		DebiasM	0.460615	0.297233	0.653333	0.523486
ComBat	0.582896	0.486166	0.498889	0.48472		ComBat	0.613278	0.416601	0.604444	0.524052		ComBat	0.646662	0.418182	0.704444	0.489813
Transformation: gptemb
ElasticNet						RandomForest						TabPFN
Project	PRJEB23052	PRJNA516054	PRJNA451479	PRJNA686821		Project	PRJEB23052	PRJNA516054	PRJNA451479	PRJNA686821		Project	PRJEB23052	PRJNA516054	PRJNA451479	PRJNA686821
PRJEB23052	0.507407	0.5	0.5	0.5		PRJEB23052	0.466534	0.602767	0.563889	0.54584		PRJEB23052	0.497487	0.623715	0.602222	0.506508
PRJNA516054	0.586647	0.516364	0.538889	0.464346		PRJNA516054	0.555139	0.519545	0.484444	0.573995		PRJNA516054	0.578395	0.563636	0.484444	0.519242
PRJNA451479	0.534884	0.425296	0.45	0.431805		PRJNA451479	0.542011	0.474308	0.566667	0.439304		PRJNA451479	0.528882	0.444269	0.561111	0.46661
PRJNA686821	0.5	0.5	0.5	0.477622		PRJNA686821	0.625656	0.643478	0.493889	0.538151		PRJNA686821	0.551388	0.594466	0.478889	0.527117
LOSO	0.575394	0.589723	0.518889	0.518676		LOSO	0.535259	0.605534	0.453333	0.495756		LOSO	0.556639	0.596838	0.498889	0.546406

## Sheet: ASD_Metagenomics_species
Transformation: RA
ElasticNet						RandomForest						TabPFN
Project	PRJEB23052	PRJNA516054	PRJNA451479	PRJNA686821		Project	PRJEB23052	PRJNA516054	PRJNA451479	PRJNA686821		Project	PRJEB23052	PRJNA516054	PRJNA451479	PRJNA686821
PRJEB23052	0.496296	0.5	0.5	0.5		PRJEB23052	0.980688	0.354941	0.792778	0.474109		PRJEB23052	0.992593	0.47668	0.853333	0.503396
PRJNA516054	0.5	0.5	0.5	0.5		PRJNA516054	0.414104	0.605	0.475556	0.467176		PRJNA516054	0.452363	0.693636	0.422222	0.363611
PRJNA451479	0.465866	0.502767	0.611111	0.572722		PRJNA451479	0.724681	0.427273	0.813889	0.475099		PRJNA451479	0.675169	0.450593	0.75	0.47425
PRJNA686821	0.549887	0.524111	0.446667	0.421902		PRJNA686821	0.572018	0.486166	0.578889	0.636606		PRJNA686821	0.603901	0.464032	0.55	0.601447
LOSO	0.593398	0.564427	0.541111	0.444822		LOSO	0.611403	0.490119	0.598889	0.438738		LOSO	0.628657	0.56996	0.588889	0.464629
DebiasM	0.537884	0.524111	0.567778	0.52858		DebiasM	0.651913	0.608696	0.713333	0.47326		DebiasM	0.570143	0.480632	0.557778	0.457555
ComBat	0.612153	0.559684	0.627778	0.499434		ComBat	0.541635	0.604743	0.534444	0.530419		ComBat	0.522881	0.559684	0.582222	0.634409
MMUPHin	0.574644	0.498814	0.523333	0.492643		MMUPHin	0.634659	0.577866	0.635556	0.488115		MMUPHin	0.711178	0.579447	0.55	0.517261
Transformation: binary
ElasticNet						RandomForest						TabPFN
Project	PRJEB23052	PRJNA516054	PRJNA451479	PRJNA686821		Project	PRJEB23052	PRJNA516054	PRJNA451479	PRJNA686821		Project	PRJEB23052	PRJNA516054	PRJNA451479	PRJNA686821
PRJEB23052	0.987963	0.362846	0.703889	0.427702		PRJEB23052	0.975926	0.425692	0.778333	0.496038		PRJEB23052	0.995833	0.378656	0.756667	0.475382
PRJNA516054	0.642911	0.591818	0.337778	0.505093		PRJNA516054	0.446362	0.716364	0.35	0.584607		PRJNA516054	0.392348	0.63	0.278889	0.548104
PRJNA451479	0.5994	0.349802	0.805556	0.456565		PRJNA451479	0.704051	0.368379	0.794444	0.515563		PRJNA451479	0.674419	0.473518	0.827778	0.462083
PRJNA686821	0.551388	0.539921	0.435556	0.528467		PRJNA686821	0.588522	0.528063	0.503333	0.584008		PRJNA686821	0.602401	0.462451	0.568889	0.666356
LOSO	0.67967	0.427668	0.415556	0.506508		LOSO	0.699925	0.379447	0.502222	0.470289		LOSO	0.701425	0.464032	0.617778	0.578947
Transformation: log_std
ElasticNet						RandomForest						TabPFN
Project	PRJEB23052	PRJNA516054	PRJNA451479	PRJNA686821		Project	PRJEB23052	PRJNA516054	PRJNA451479	PRJNA686821		Project	PRJEB23052	PRJNA516054	PRJNA451479	PRJNA686821
PRJEB23052	0.873876	0.574704	0.721111	0.569892		PRJEB23052	0.982407	0.300791	0.778333	0.514573		PRJEB23052	0.988426	0.319368	0.771111	0.530843
PRJNA516054	0.5	0.536364	0.5	0.5		PRJNA516054	0.450863	0.589545	0.465	0.501273		PRJNA516054	0.32183	0.590909	0.406667	0.503679
PRJNA451479	0.780945	0.434783	0.788889	0.480475		PRJNA451479	0.85934	0.40751	0.838889	0.530419		PRJNA451479	0.817704	0.443478	0.727778	0.558291
PRJNA686821	0.449362	0.58419	0.408889	0.610315		PRJNA686821	0.604651	0.560474	0.585	0.562689		PRJNA686821	0.555889	0.475889	0.541111	0.607284
LOSO	0.723181	0.520158	0.547778	0.556593		LOSO	0.604651	0.570751	0.478889	0.42841		LOSO	0.449362	0.550988	0.715556	0.547255
DebiasM	0.612903	0.589723	0.748889	0.54103		DebiasM	0.582896	0.495652	0.62	0.517827		DebiasM	0.621905	0.426087	0.603333	0.483022
ComBat	0.642161	0.481423	0.625556	0.55348		ComBat	0.671793	0.383004	0.766667	0.429825		ComBat	0.701425	0.473518	0.756667	0.571307
Transformation: ALR
ElasticNet						RandomForest						TabPFN
Project	PRJEB23052	PRJNA516054	PRJNA451479	PRJNA686821		Project	PRJEB23052	PRJNA516054	PRJNA451479	PRJNA686821		Project	PRJEB23052	PRJNA516054	PRJNA451479	PRJNA686821
PRJEB23052	0.841601	0.562846	0.692222	0.563384		PRJEB23052	0.97295	0.354941	0.813889	0.491087		PRJEB23052	0.99213	0.36996	0.773333	0.442558
PRJNA516054	0.5	0.516364	0.5	0.5		PRJNA516054	0.450488	0.692727	0.563333	0.510753		PRJNA516054	0.380345	0.712727	0.397778	0.404075
PRJNA451479	0.659415	0.501976	0.788889	0.566214		PRJNA451479	0.732183	0.447431	0.808333	0.486559		PRJNA451479	0.745686	0.416601	0.744444	0.53056
PRJNA686821	0.578395	0.470356	0.49	0.555361		PRJNA686821	0.585521	0.452964	0.581111	0.626292		PRJNA686821	0.551388	0.458498	0.545556	0.624155
LOSO	0.717929	0.518577	0.622222	0.547538		LOSO	0.562641	0.428458	0.615	0.46562		LOSO	0.630158	0.622925	0.595556	0.598189
DebiasM	0.709677	0.501186	0.703333	0.485427		DebiasM	0.55889	0.388142	0.745556	0.495897		DebiasM	0.307577	0.468775	0.673333	0.608659
ComBat	0.686422	0.509091	0.626667	0.58206		ComBat	0.707802	0.412648	0.694444	0.444256		ComBat	0.648912	0.383399	0.755556	0.548953
Transformation: CLR
ElasticNet						RandomForest						TabPFN
Project	PRJEB23052	PRJNA516054	PRJNA451479	PRJNA686821		Project	PRJEB23052	PRJNA516054	PRJNA451479	PRJNA686821		Project	PRJEB23052	PRJNA516054	PRJNA451479	PRJNA686821
PRJEB23052	0.841601	0.572332	0.686667	0.562535		PRJEB23052	0.984524	0.303162	0.758889	0.563384		PRJEB23052	0.983796	0.286957	0.778889	0.394171
PRJNA516054	0.5	0.52	0.5	0.5		PRJNA516054	0.333833	0.630909	0.541111	0.498302		PRJNA516054	0.355589	0.684545	0.466667	0.405207
PRJNA451479	0.664666	0.498024	0.772222	0.593662		PRJNA451479	0.656039	0.49249	0.811111	0.522354		PRJNA451479	0.789197	0.472727	0.727778	0.523203
PRJNA686821	0.609902	0.46166	0.496667	0.529254		PRJNA686821	0.612153	0.571937	0.614444	0.638199		PRJNA686821	0.541635	0.469565	0.59	0.631954
LOSO	0.772693	0.516996	0.61	0.564516		LOSO	0.548387	0.488538	0.583889	0.426712		LOSO	0.590398	0.572332	0.554444	0.520091
DebiasM	0.670668	0.467194	0.627778	0.558574		DebiasM	0.421605	0.378656	0.695556	0.535088		DebiasM	0.553638	0.347036	0.688889	0.530843
ComBat	0.702176	0.52253	0.663333	0.579513		ComBat	0.769692	0.439526	0.627778	0.469157		ComBat	0.754689	0.441107	0.758889	0.544143
Transformation: gptemb
ElasticNet						RandomForest						TabPFN
Project	PRJEB23052	PRJNA516054	PRJNA451479	PRJNA686821		Project	PRJEB23052	PRJNA516054	PRJNA451479	PRJNA686821		Project	PRJEB23052	PRJNA516054	PRJNA451479	PRJNA686821
PRJEB23052	0.488889	0.618972	0.582222	0.496887		PRJEB23052	0.568056	0.545059	0.536667	0.56961		PRJEB23052	0.506019	0.623715	0.562222	0.442841
PRJNA516054	0.504876	0.537273	0.537778	0.485003		PRJNA516054	0.472618	0.631818	0.413333	0.541879		PRJNA516054	0.425356	0.583636	0.383333	0.493209
PRJNA451479	0.550638	0.498024	0.705556	0.468308		PRJNA451479	0.573518	0.462846	0.738889	0.531551		PRJNA451479	0.567142	0.498814	0.694444	0.514148
PRJNA686821	0.528882	0.454545	0.625556	0.467259		PRJNA686821	0.523256	0.540316	0.557222	0.582653		PRJNA686821	0.606152	0.463241	0.588889	0.510956
LOSO	0.621905	0.544664	0.563333	0.48472		LOSO	0.626407	0.544664	0.579444	0.609649		LOSO	0.630158	0.577866	0.562222	0.535088

## Sheet: AS_Metagenomics_genus
Transformation: RA
ElasticNet				RandomForest				TabPFN				MGM
Project	PRJNA375935	PRJEB28545		Project	PRJNA375935	PRJEB28545		Project	PRJNA375935	PRJEB28545		Project	PRJNA375935	PRJEB28545
PRJNA375935	0.85879	0.475963		PRJNA375935	0.92909	0.612413		PRJNA375935	0.943851	0.546759		PRJNA375935	0.88342	0.6873
PRJEB28545	0.356574	0.59093		PRJEB28545	0.567417	0.846037		PRJEB28545	0.70926	0.847791		PRJEB28545	0.7074	0.73526
Transformation: binary
ElasticNet				RandomForest				TabPFN
Project	PRJNA375935	PRJEB28545		Project	PRJNA375935	PRJEB28545		Project	PRJNA375935	PRJEB28545
PRJNA375935	0.889849	0.63956		PRJNA375935	0.899752	0.675197		PRJNA375935	0.893559	0.682612
PRJEB28545	0.701121	0.789808		PRJEB28545	0.70302	0.817134		PRJEB28545	0.699222	0.820702
Transformation: log_std
ElasticNet				RandomForest				TabPFN
Project	PRJNA375935	PRJEB28545		Project	PRJNA375935	PRJEB28545		Project	PRJNA375935	PRJEB28545
PRJNA375935	0.927437	0.567568		PRJNA375935	0.933985	0.570677		PRJNA375935	0.936731	0.552978
PRJEB28545	0.720203	0.840288		PRJEB28545	0.605806	0.822237		PRJEB28545	0.738379	0.837218
Transformation: ALR
ElasticNet				RandomForest				TabPFN
Project	PRJNA375935	PRJEB28545		Project	PRJNA375935	PRJEB28545		Project	PRJNA375935	PRJEB28545
PRJNA375935	0.92023	0.57857		PRJNA375935	0.931245	0.582636		PRJNA375935	0.94069	0.586223
PRJEB28545	0.634835	0.817561		PRJEB28545	0.620818	0.828702		PRJEB28545	0.724905	0.837747
Transformation: CLR
ElasticNet				RandomForest				TabPFN
Project	PRJNA375935	PRJEB28545		Project	PRJNA375935	PRJEB28545		Project	PRJNA375935	PRJEB28545
PRJNA375935	0.920688	0.580722		PRJNA375935	0.934212	0.577135		PRJNA375935	0.942067	0.517819
PRJEB28545	0.63185	0.802364		PRJEB28545	0.670148	0.683089		PRJEB28545	0.707452	0.795885
Transformation: gptemb
ElasticNet				RandomForest				TabPFN
Project	PRJNA375935	PRJEB28545		Project	PRJNA375935	PRJEB28545		Project	PRJNA375935	PRJEB28545
PRJNA375935	0.86031	0.44774		PRJNA375935	0.779446	0.41868		PRJNA375935	0.859795	0.445587
PRJEB28545	0.392386	0.551814		PRJEB28545	0.386869	0.553388		PRJEB28545	0.45198	0.568626

## Sheet: AS_Metagenomics_species
Transformation: RA
ElasticNet				RandomForest				TabPFN
Project	PRJNA375935	PRJEB28545		Project	PRJNA375935	PRJEB28545		Project	PRJNA375935	PRJEB28545
PRJNA375935	0.889685	0.430997		PRJNA375935	0.947025	0.456589		PRJNA375935	0.961693	0.538388
PRJEB28545	0.405498	0.673391		PRJEB28545	0.599792	0.852555		PRJEB28545	0.624977	0.910615
Transformation: binary
ElasticNet				RandomForest				TabPFN
Project	PRJNA375935	PRJEB28545		Project	PRJNA375935	PRJEB28545		Project	PRJNA375935	PRJEB28545
PRJNA375935	0.902321	0.577374		PRJNA375935	0.886494	0.678546		PRJNA375935	0.931448	0.661325
PRJEB28545	0.532465	0.944156		PRJEB28545	0.605625	0.906508		PRJEB28545	0.60662	0.882573
Transformation: log_std
ElasticNet				RandomForest				TabPFN
Project	PRJNA375935	PRJEB28545		Project	PRJNA375935	PRJEB28545		Project	PRJNA375935	PRJEB28545
PRJNA375935	0.951411	0.579766		PRJNA375935	0.93962	0.472853		PRJNA375935	0.951898	0.508012
PRJEB28545	0.54386	0.936385		PRJEB28545	0.640351	0.822491		PRJEB28545	0.649937	0.910298
Transformation: ALR
ElasticNet				RandomForest				TabPFN
Project	PRJNA375935	PRJEB28545		Project	PRJNA375935	PRJEB28545		Project	PRJNA375935	PRJEB28545
PRJNA375935	0.904587	0.623057		PRJNA375935	0.955286	0.483856		PRJNA375935	0.961951	0.549868
PRJEB28545	0.526497	0.917462		PRJEB28545	0.574154	0.847268		PRJEB28545	0.588081	0.927873
Transformation: CLR
ElasticNet				RandomForest				TabPFN
Project	PRJNA375935	PRJEB28545		Project	PRJNA375935	PRJEB28545		Project	PRJNA375935	PRJEB28545
PRJNA375935	0.896833	0.629514		PRJNA375935	0.937684	0.450012		PRJNA375935	0.942425	0.539584
PRJEB28545	0.519624	0.907842		PRJEB28545	0.551094	0.79182		PRJEB28545	0.594863	0.924887
Transformation: gptemb
ElasticNet				RandomForest				TabPFN
Project	PRJNA375935	PRJEB28545		Project	PRJNA375935	PRJEB28545		Project	PRJNA375935	PRJEB28545
PRJNA375935	0.886724	0.421909		PRJNA375935	0.811673	0.402177		PRJNA375935	0.875733	0.44774
PRJEB28545	0.447911	0.647043		PRJEB28545	0.393335	0.65348		PRJEB28545	0.446012	0.652329

## Sheet: Adenoma_Metagenomics_genus
Transformation: RA
ElasticNet					RandomForest					TabPFN					MGM
Project	PRJEB7774	PRJEB6070	PRJNA447983		Project	PRJEB7774	PRJEB6070	PRJNA447983		Project	PRJEB7774	PRJEB6070	PRJNA447983		Project	PRJEB7774	PRJEB6070	PRJNA447983
PRJEB7774	0.501852	0.567821	0.531339		PRJEB7774	0.505892	0.574134	0.735755		PRJEB7774	0.444444	0.493867	0.65812		PRJEB7774	0.5096	0.369	0.3697
PRJEB6070	0.566102	0.554976	0.663105		PRJEB6070	0.535405	0.6154	0.643162		PRJEB6070	0.602637	0.60351	0.742165		PRJEB6070	0.5326	0.41522	0.6129
PRJNA447983	0.564218	0.59596	0.669879		PRJNA447983	0.503202	0.50956	0.733697		PRJNA447983	0.548023	0.53824	0.669697		PRJNA447983	0.4981	0.4727	0.60996
LOSO	0.574011	0.536797	0.704416		LOSO	0.597552	0.557179	0.725783		LOSO	0.572881	0.633838	0.672365		LOSO	0.4444	0.5658	0.518
DebiasM	0.52354	0.518038	0.768519		DebiasM	0.577778	0.550144	0.701567		DebiasM	0.53371	0.558081	0.733618
ComBat	0.536723	0.575397	0.537037		ComBat	0.6371	0.609668	0.650285		ComBat	0.580791	0.603175	0.627493
MMUPHin	0.536347	0.602814	0.539886		MMUPHin	0.539736	0.486652	0.605769		MMUPHin	0.575141	0.589827	0.653846
Transformation: binary
ElasticNet					RandomForest					TabPFN
Project	PRJEB7774	PRJEB6070	PRJNA447983		Project	PRJEB7774	PRJEB6070	PRJNA447983		Project	PRJEB7774	PRJEB6070	PRJNA447983
PRJEB7774	0.533165	0.453824	0.438746		PRJEB7774	0.439226	0.549603	0.631054		PRJEB7774	0.456902	0.512987	0.544872
PRJEB6070	0.545763	0.516651	0.685897		PRJEB6070	0.555179	0.530586	0.683048		PRJEB6070	0.552542	0.536966	0.63604
PRJNA447983	0.461582	0.56241	0.740788		PRJNA447983	0.484369	0.522908	0.745636		PRJNA447983	0.479473	0.575036	0.762667
LOSO	0.492655	0.555556	0.571225		LOSO	0.566855	0.488095	0.689459		LOSO	0.543126	0.51912	0.657407
Transformation: log_std
ElasticNet					RandomForest					TabPFN
Project	PRJEB7774	PRJEB6070	PRJNA447983		Project	PRJEB7774	PRJEB6070	PRJNA447983		Project	PRJEB7774	PRJEB6070	PRJNA447983
PRJEB7774	0.495118	0.494228	0.640313		PRJEB7774	0.531229	0.630592	0.586538		PRJEB7774	0.431987	0.564214	0.637464
PRJEB6070	0.578531	0.521825	0.68661		PRJEB6070	0.614313	0.596368	0.756054		PRJEB6070	0.604143	0.576694	0.776353
PRJNA447983	0.502072	0.540765	0.702182		PRJNA447983	0.533333	0.566198	0.692455		PRJNA447983	0.541243	0.574315	0.696788
LOSO	0.586817	0.530664	0.747151		LOSO	0.564407	0.50974	0.701567		LOSO	0.575141	0.594877	0.700142
DebiasM	0.544256	0.469336	0.711538		DebiasM	0.535782	0.570707	0.64245		DebiasM	0.587194	0.556638	0.709402
ComBat	0.595857	0.515152	0.742165		ComBat	0.574576	0.616162	0.695869		ComBat	0.564218	0.625541	0.720798
Transformation: ALR
ElasticNet					RandomForest					TabPFN
Project	PRJEB7774	PRJEB6070	PRJNA447983		Project	PRJEB7774	PRJEB6070	PRJNA447983		Project	PRJEB7774	PRJEB6070	PRJNA447983
PRJEB7774	0.50101	0.603896	0.594017		PRJEB7774	0.552862	0.590548	0.691595		PRJEB7774	0.421886	0.535714	0.678775
PRJEB6070	0.559322	0.566896	0.67094		PRJEB6070	0.615066	0.537302	0.676994		PRJEB6070	0.615819	0.599786	0.689459
PRJNA447983	0.516761	0.588384	0.792788		PRJNA447983	0.530697	0.502345	0.714		PRJNA447983	0.559322	0.546537	0.678606
LOSO	0.618079	0.601371	0.698006		LOSO	0.608098	0.608947	0.700855		LOSO	0.581921	0.599206	0.724359
DebiasM	0.575518	0.578283	0.633903		DebiasM	0.60452	0.541486	0.699786		DebiasM	0.53258	0.590909	0.680199
ComBat	0.639548	0.535354	0.729345		ComBat	0.588324	0.554113	0.658476		ComBat	0.575141	0.62013	0.712963
Transformation: CLR
ElasticNet					RandomForest					TabPFN
Project	PRJEB7774	PRJEB6070	PRJNA447983		Project	PRJEB7774	PRJEB6070	PRJNA447983		Project	PRJEB7774	PRJEB6070	PRJNA447983
PRJEB7774	0.495623	0.618687	0.633903		PRJEB7774	0.459764	0.566378	0.623575		PRJEB7774	0.408418	0.579726	0.641026
PRJEB6070	0.561582	0.550443	0.690171		PRJEB6070	0.480038	0.509638	0.631766		PRJEB6070	0.589077	0.577595	0.73433
PRJNA447983	0.550659	0.597403	0.793212		PRJNA447983	0.477778	0.478355	0.688273		PRJNA447983	0.581921	0.577561	0.68
LOSO	0.650094	0.635642	0.702991		LOSO	0.54049	0.547619	0.717236		LOSO	0.571751	0.534993	0.692308
DebiasM	0.535593	0.594517	0.67735		DebiasM	0.477778	0.536977	0.765313		DebiasM	0.565348	0.574315	0.792735
ComBat	0.637288	0.554473	0.725071		ComBat	0.572128	0.593975	0.580128		ComBat	0.567608	0.61075	0.69943
Transformation: gptemb
ElasticNet					RandomForest					TabPFN
Project	PRJEB7774	PRJEB6070	PRJNA447983		Project	PRJEB7774	PRJEB6070	PRJNA447983		Project	PRJEB7774	PRJEB6070	PRJNA447983
PRJEB7774	0.472222	0.5	0.5		PRJEB7774	0.468266	0.615801	0.547009		PRJEB7774	0.442424	0.632756	0.650997
PRJEB6070	0.505461	0.488843	0.524217		PRJEB6070	0.499812	0.596642	0.606838		PRJEB6070	0.476836	0.549603	0.503561
PRJNA447983	0.520151	0.613636	0.659455		PRJNA447983	0.528249	0.617965	0.713121		PRJNA447983	0.52693	0.602814	0.739091
LOSO	0.548399	0.531025	0.595442		LOSO	0.543126	0.593254	0.613604		LOSO	0.555179	0.569264	0.532764

## Sheet: Adenoma_Metagenomics_species
Transformation: RA
ElasticNet					RandomForest					TabPFN
Project	PRJEB7774	PRJEB6070	PRJNA447983		Project	PRJEB7774	PRJEB6070	PRJNA447983		Project	PRJEB7774	PRJEB6070	PRJNA447983
PRJEB7774	0.472222	0.5	0.5		PRJEB7774	0.586195	0.553752	0.590456		PRJEB7774	0.395623	0.492063	0.668091
PRJEB6070	0.476836	0.625702	0.566952		PRJEB6070	0.544256	0.583593	0.655271		PRJEB6070	0.503578	0.573855	0.76567
PRJNA447983	0.577401	0.576118	0.702788		PRJNA447983	0.490019	0.562049	0.757091		PRJNA447983	0.477213	0.62518	0.799455
LOSO	0.53936	0.515873	0.566952		LOSO	0.578531	0.551768	0.815171		LOSO	0.568738	0.512266	0.7849
DebiasM	0.552166	0.466811	0.671652		DebiasM	0.618456	0.571068	0.766382		DebiasM	0.600377	0.551948	0.767806
ComBat	0.545763	0.527778	0.485755		ComBat	0.515254	0.566378	0.655271		ComBat	0.494539	0.615801	0.748575
MMUPHin	0.550282	0.577561	0.611111		MMUPHin	0.551036	0.596681	0.77849		MMUPHin	0.567232	0.553752	0.781339
Transformation: binary
ElasticNet					RandomForest					TabPFN
Project	PRJEB7774	PRJEB6070	PRJNA447983		Project	PRJEB7774	PRJEB6070	PRJNA447983		Project	PRJEB7774	PRJEB6070	PRJNA447983
PRJEB7774	0.618855	0.527417	0.575499		PRJEB7774	0.531734	0.523449	0.578348		PRJEB7774	0.444108	0.468975	0.512108
PRJEB6070	0.539736	0.633303	0.639601		PRJEB6070	0.54275	0.476236	0.7151		PRJEB6070	0.566855	0.466392	0.690171
PRJNA447983	0.496798	0.590909	0.800667		PRJNA447983	0.499058	0.578644	0.794455		PRJNA447983	0.438795	0.621934	0.777394
LOSO	0.571375	0.555916	0.549145		LOSO	0.551036	0.595238	0.74359		LOSO	0.557062	0.606061	0.705128
Transformation: log_std
ElasticNet					RandomForest					TabPFN
Project	PRJEB7774	PRJEB6070	PRJNA447983		Project	PRJEB7774	PRJEB6070	PRJNA447983		Project	PRJEB7774	PRJEB6070	PRJNA447983
PRJEB7774	0.549495	0.569986	0.706553		PRJEB7774	0.546212	0.5671	0.445157		PRJEB7774	0.418519	0.565657	0.610399
PRJEB6070	0.520904	0.559432	0.689459		PRJEB6070	0.626742	0.546406	0.739316		PRJEB6070	0.5258	0.573871	0.764957
PRJNA447983	0.522411	0.584055	0.755818		PRJNA447983	0.564218	0.594156	0.741576		PRJNA447983	0.463277	0.637807	0.79703
LOSO	0.555556	0.555916	0.631766		LOSO	0.563089	0.566198	0.742165		LOSO	0.544633	0.625902	0.782764
DebiasM	0.59322	0.487374	0.738604		DebiasM	0.545386	0.619949	0.609687		DebiasM	0.500565	0.551587	0.586895
ComBat	0.552919	0.559163	0.652422		ComBat	0.550471	0.605339	0.647436		ComBat	0.572128	0.619408	0.799858
Transformation: ALR
ElasticNet					RandomForest					TabPFN
Project	PRJEB7774	PRJEB6070	PRJNA447983		Project	PRJEB7774	PRJEB6070	PRJNA447983		Project	PRJEB7774	PRJEB6070	PRJNA447983
PRJEB7774	0.429798	0.5	0.5		PRJEB7774	0.461364	0.609848	0.626781		PRJEB7774	0.440404	0.521645	0.561254
PRJEB6070	0.559322	0.609371	0.647436		PRJEB6070	0.47646	0.565629	0.771724		PRJEB6070	0.513748	0.580266	0.777066
PRJNA447983	0.470433	0.669192	0.701333		PRJNA447983	0.420716	0.567641	0.758		PRJNA447983	0.451224	0.676768	0.791333
LOSO	0.535217	0.68759	0.67094		LOSO	0.575141	0.612915	0.777778		LOSO	0.52354	0.651876	0.826211
DebiasM	0.565348	0.647547	0.680912		DebiasM	0.54275	0.660173	0.752849		DebiasM	0.526554	0.643218	0.788462
ComBat	0.566478	0.664502	0.655983		ComBat	0.555932	0.560967	0.732194		ComBat	0.522034	0.628788	0.739316
Transformation: CLR
ElasticNet					RandomForest					TabPFN
Project	PRJEB7774	PRJEB6070	PRJNA447983		Project	PRJEB7774	PRJEB6070	PRJNA447983		Project	PRJEB7774	PRJEB6070	PRJNA447983
PRJEB7774	0.455724	0.5	0.5		PRJEB7774	0.538889	0.564574	0.353632		PRJEB7774	0.520034	0.578644	0.491453
PRJEB6070	0.563089	0.59562	0.660969		PRJEB6070	0.616573	0.466285	0.816595		PRJEB6070	0.520527	0.604274	0.702279
PRJNA447983	0.46629	0.67316	0.715576		PRJNA447983	0.42693	0.53355	0.763515		PRJNA447983	0.444068	0.611833	0.724788
LOSO	0.538606	0.680014	0.666667		LOSO	0.499435	0.630952	0.641738		LOSO	0.529944	0.61544	0.535613
DebiasM	0.53371	0.526696	0.719373		DebiasM	0.543879	0.565476	0.643875		DebiasM	0.52354	0.558802	0.748575
ComBat	0.567985	0.656205	0.697293		ComBat	0.4742	0.612013	0.626068		ComBat	0.481733	0.587662	0.608974
Transformation: gptemb
ElasticNet					RandomForest					TabPFN
Project	PRJEB7774	PRJEB6070	PRJNA447983		Project	PRJEB7774	PRJEB6070	PRJNA447983		Project	PRJEB7774	PRJEB6070	PRJNA447983
PRJEB7774	0.438889	0.614719	0.622507		PRJEB7774	0.528704	0.582071	0.603989		PRJEB7774	0.58468	0.631674	0.688034
PRJEB6070	0.505838	0.566545	0.560541		PRJEB6070	0.512241	0.573329	0.619658		PRJEB6070	0.486252	0.537622	0.494302
PRJNA447983	0.616573	0.531025	0.697758		PRJNA447983	0.510169	0.572872	0.721758		PRJNA447983	0.658004	0.505051	0.734
LOSO	0.557815	0.494589	0.526353		LOSO	0.488889	0.591631	0.584402		LOSO	0.523164	0.521645	0.535613

[truncated: 32 more sheets: CDI_Amplicon_genus, CD_Amplicon_genus, CD_Metagenomics_genus, CD_Metagenomics_species, CFS_Amplicon_genus, CRC_Amplicon_genus, CRC_Metagenomics_genus, CRC_Metagenomics_species, IBD_Metagenomics_genus, IBD_Metagenomics_species, IBS_Amplicon_genus, JA_Amplicon_genus, MCI_Amplicon_genus, MS_Amplicon_genus, NAFLD_Amplicon_genus, Obesity_Metagenomics_genus, Obesity_Metagenomics_species, Overweight_Metagenomics_genus, Overweight_Metagenomics_species, PD_Amplicon_genus …]
